# Supplementary material for: Enzymatically oxidized phospholipids restore thrombin generation in coagulation factor deficiencies
Source: JCI journal article supplement (doi:10.1172/jci.insight.98459), 2018-03-21
Supplement: sd1 [file 1]

## SUPPLEMENTARY DATA

| Enzyme    | Cofactor   | Substrate | Control                |            | 12-HETE-PE             |             | 15-HETE-PE             |            |
|-----------|------------|-----------|------------------------|------------|------------------------|-------------|------------------------|------------|
|           |            |           | $V_{max}$ ( $s^{-1}$ ) | $K_m$ (nM) | $V_{max}$ ( $s^{-1}$ ) | $K_m$ (nM)  | $V_{max}$ ( $s^{-1}$ ) | $K_m$ (nM) |
| 1nM Xa    | 1nM Va     | 0-8mM II  | 0.96 ± 0.04            | 64.1 ± 7.8 | 0.77 ± 0.11            | 75.3 ± 6.0  | 0.98 ± 0.10            | 80.1 ± 7.8 |
| 1nM IXa   | 10nM VIIIa | 0-500nM X | 0.56 ± 0.08            | 36.3 ± 4.4 | 0.59 ± 0.09            | 40.13 ± 5.3 | 0.51 ± 0.08            | 37.8 ± 4.1 |
| 10pM VIIa | 10pM rTF   | 0-500nM X | 2.61 ± 0.23            | 23.8 ± 4.0 | 3.49 ± 0.51            | 28.5 ± 4.9  | 3.47 ± 0.39            | 21.3 ± 5.2 |
| 10pM VIIa | 10pM rTF   | 0-2mM IX  | 1.69 ± 0.12            | 62.1 ± 2.2 | 1.80 ± 0.08            | 66.6 ± 3.1  | 2.06 ± 0.13            | 72.0 ± 8.1 |

**Supplementary Table 1. HETE-PEs do not enhance VIIa/TF, intrinsic tenase (VIIIa/IXa), or prothrombinase (VaXa) activities using standard kinetic assays.** Liposomes were made with/without tissue factor as described in Methods, replacing 10 % SAPE with 10 % 12- or 15-HETE-PE, final lipid concentration 4  $\mu$ M.  $V_{max}$  is expressed as the number of substrate (X or IX, X, II respectively) factor proteins activated per second for each enzyme, where turnover is about 1-3 per second (n = 4-7 per condition, mean  $\pm$  SEM).

| Type of Operation       | Number |
|-------------------------|--------|
| AVR                     | 3      |
| AVR + another procedure | 5      |
| MV Repair/Replacement   | 2      |
| Redo AVR                | 2      |

**Supplementary Table 2. Types of operation performed on patients from whom platelet PL were analyzed pre- and post-CPB** (AVR = aortic valve replacement, MV = mitral valve). The median time on bypass was 125 minutes (interquartile range 107-170, range 75 - 389 minutes) and median aortic cross clamp time was 99 minutes (interquartile range 84-136, range 48-249).

| Type of Operation                                    | Number |
|------------------------------------------------------|--------|
| AVR                                                  | 23     |
| AVR + another procedure                              | 36     |
| MV Repair/Replacement                                | 6      |
| MV Repair/Replacement + another procedure            | 12     |
| Redo AVR +/- another procedure                       | 4      |
| Replacement of ascending aorta +/- another procedure | 5      |
| LV aneurysmectomy and CABG                           | 1      |

**Supplementary Table 3. Types of operation performed on CPB patients.** (AVR = aortic valve replacement, MV = mitral valve, LV = left ventricle, CABG = coronary artery bypass graft). The median age was 69 (interquartile range 66-77, range 28-88), median time on bypass 144 minutes (interquartile range 111-178, range 57-427), an median aortic cross-clamp time 114 (interquartile range 86-141, range 49-334)
